# Supplementary material for: Added Value of Impact Microindentation in the Evaluation of Bone Fragility: A Systematic Review of the Literature
Source: PubMed Central journal article supplement (PMC7020781; doi:10.3389/fendo.2020.00015), 2020-02-07
Supplement: Data_Sheet_1.pdf [file Data_Sheet_1.pdf]

## *Supplementary Material*

### 1. Search strategy

#### Pubmed

((("reference point indentation"[tw] OR (("indentation"[tw] OR "microindentation"[tw] OR indentat\*[tw] OR microindentat\*[tw]) AND ("reference point"[tw] OR "reference points"[tw] OR reference point\*[tw])) OR (("indentation"[tw] OR "microindentation"[tw] OR indentat\*[tw] OR microindentat\*[tw]) AND ("Bone Density"[mesh] OR "bone density"[tw] OR "bone mineral density"[tw] OR "bone fragility"[tw])) OR "impact microindentation"[tw] OR "Osteoprobe"[tw] OR osteoprob\*[tw] OR ("Bone Material"[tw] AND ("Clinical Risk Factor"[tw] OR "Clinical Risk Factors"[tw]) AND Fractur\*[tw])) NOT ("Animals"[mesh] NOT "Humans"[mesh]))

#### Embase

((("reference point indentation".mp OR (("indentation".mp OR "microindentation".mp OR indentat\*.mp OR microindentat\*.mp) AND ("reference point".mp OR "reference points".mp OR reference point\*.mp)) OR (("indentation".mp OR "microindentation".mp OR indentat\*.mp OR microindentat\*.mp) AND (exp "Bone Density"/ OR "bone density".mp OR "bone mineral density".mp OR "Bone Fragility"/ OR "bone fragility".mp)) OR "impact microindentation".mp OR "Osteoprobe".mp OR osteoprob\*.mp OR ("Bone Material".mp AND ("Clinical Risk Factor".mp OR "Clinical Risk Factors".mp) AND Fractur\*.mp)) AND exp "Humans"/)

#### Web of Science

(ts=("reference point indentation" OR (("indentation" OR "microindentation" OR indentat\* OR microindentat\*)) AND ("reference point" OR "reference points" OR "reference point\*")) OR (("indentation" OR "microindentation" OR indentat\* OR microindentat\*) AND ("Bone Density" OR "bone density" OR "bone mineral density" OR "Bone Fragility" OR "bone fragility")) OR "impact microindentation" OR "Osteoprobe" OR osteoprob\* OR ("Bone Material" AND "Clinical Risk Factor\*" AND Fractur\*)) NOT ti=(veterinary OR rabbit OR rabbits OR animal OR animals OR mouse OR mice OR rodent OR rodents OR rat OR rats OR pig OR pigs OR porcine OR horse\* OR equine OR cow OR cows OR bovine OR goat OR goats OR sheep OR ovine OR canine OR dog OR dogs OR feline OR cat OR cats))

## 2. Supplementary Table

### **Supplementary Table.** Adapted Newcastle Ottawa Scale

This scale has been adapted from the Newcastle-Ottawa Quality Assessment Scale to provide a quality assessment.

#### **Selection:** (Maximum 3 points)

1. Representativeness of the sample:
  - a. Obviously representative of the average in the target population (all subjects or random sampling). \*
  - b. Somewhat representative of the average in the target group (non-random sampling). \*
  - c. Convenience sample.
  - d. No description of the derivation of the included subjects.
  
2. Sample size:
  - a. Justified, including sample size calculation. \*
  - b. Not justified.
  - c. No information provided.
  
3. Non-respondents:
  - a. Proportion of target sample recruited attains pre-specified target and basic summary of non-respondent characteristics in sampling frame recorded. \*
  - b. Unsatisfactory recruitment rate or no summary data on non-respondents.
  - c. No information provided.

#### **Comparability:** (Maximum 2 points)

1. Comparability of subjects in different outcome groups on the basis of design or analysis. Confounding factors controlled.
  - a. Data/ results adjusted for relevant confounders, including age (if applicable) and operator (if multiple). \*\*
  - b. Only adjusted for relevant confounders, excluding operator / no information regarding number of operators. \*
  - c. Data/results not adjusted for relevant confounders / no information regarding confounders or number of operators.

**Exposure/Outcome:** (Maximum 5 points)

1. Application of the Impact Microindentation technique
  - a. Information if certain measurements are flagged and intraobserver CV provided. \*\*
  - b. Only one of the two under a. provided information is given. \*
  - c. No description of flagged measurements and intraobserver CV.
  
2. Application of Vertebral fracture assessment tools
  - a. Use of vertebral fracture assessment or spinal radiographs for detecting VF. \*\*
  - b. Medical records. \*
  - c. Vertebral fractures only self-reported.
  
3. Statistical test:
  - a. The statistical test used to analyze the data is clearly described and appropriate, and the measurement of the association is presented (including SD/SE and the probability level; p value). \*
  - b. The statistical test is not appropriate, not described or incomplete.

**Good:** 8-10 points

**Satisfactory:** 5-7 points

**Unsatisfactory:** 0 to 4 points
